# Supplementary material
Source: PubMed Central journal article supplement (PMC547816)

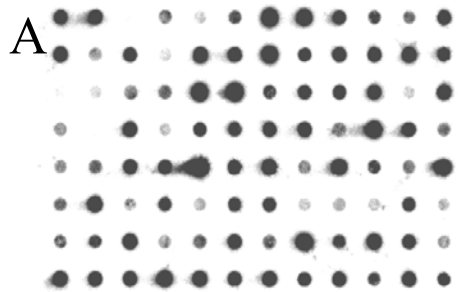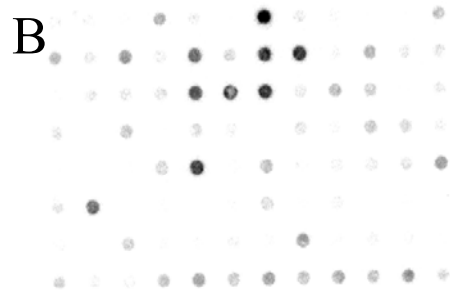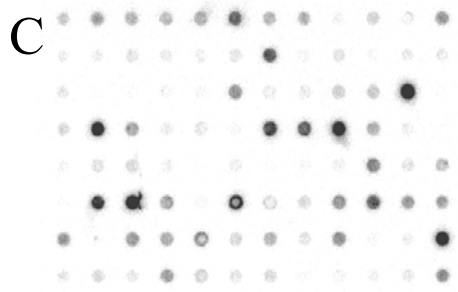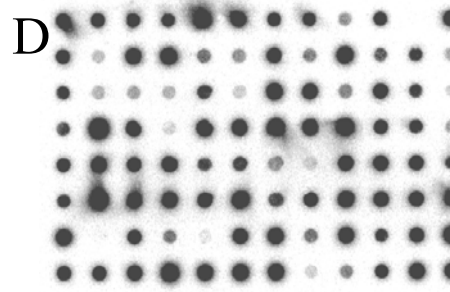

Supplement: pnas_102_5_1513__5.pdf [file pnas_102_5_1513__5.pdf]
